# Supplementary material for: Prevalence of intestinal parasites among inmates in Midwest Brazil
Source: PubMed Central journal article supplement (PMC5608187; doi:10.1371/journal.pone.0182248), 2017-09-21
Supplement: pone.0182248.s002.pdf [file pone.0182248.s002.pdf]

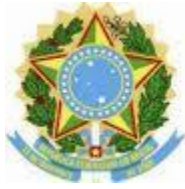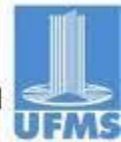

Nº.....

**APPENDIX B**

**FORM TO OBTAIN SOCIOECONOMIC, DEMOGRAPHIC AND EPIDEMIOLOGICAL DATA – RESEARCH PROJECT “PREVALENCE OF PARASITIC INFECTIONS IN INMATES OF THE PRISONAL SYSTEM OF MID-WEST REGION, BRAZIL”.**

PRISON UNIT: .....

Gallery:.....Number of inmates:.....

Size of the cell?..... The cell has windows?..... How many?.....

The institution has potable water? ( ) Yes ( ) No

In case of negative answer, how it is obtained?.....

The institution has sewerage system? ( ) Yes ( ) No

In case of negative answer, how it is eliminated? .....

1. Name: .....

2. City of origin:..... 3. State of origin:..... 4. Birth Date: ...../...../.....

5. Age: ..... 6. Nationality: ..... 7. Gender: ..... 8. Marital status :.....

9. Prison time?..... 10. Cell number:.....

11. How many people sharing the same cell :.....

12. Ethnicity: a) Caucasian b) Black c) Brown d) Asian

13. What is your Education Level?

Illiterate (a) ( )

Incomplete Primary ( )

Complete Primary ( )

Incomplete Second ( )

Complete Second ( )

Incomplete Higher ( )

Complete Higher ( )

Technical Course ( )

14. Before being arrested what kind of job did you use to have?.....

15. Have you dealt with vegetable Garden? ( ) Yes ( ) No

16. Adding the income of all persons who live with you in the same household (including your income before being arrested ), which were your family's monthly income ?

( ) until 1 Minimum Wage

( ) 2 to 3 Minimum Wage

( ) 1 to 2 Minimum Wage

( ) Above 4 Minimum Wage

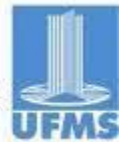

17. House type: ( ) Brick ( ) Wood ( ) Shed Other type: \_\_\_\_\_

18. How many rooms in your house?..... How many bathrooms? .....

19. What type of sanitation system in your house? ( ) Sewage ( ) Cesspool

20. Do you house has access to sewerage system? ( ) Yes ( ) No Electrical Energy? ( ) Yes ( ) No

Potable Water? ( ) Yes ( ) No

21. Do you know what parasites mean? ( ) Yes ( ) No

22. Do you know the way of transmission of parasites? ( ) Yes ( ) No

23. Do you have or have ever had any parasitic disease in the previous 2 years? ( ) Yes ( ) No ( ) Do not know.

How long:.....

24. Have you undergone any anti-parasitic treatment in the previous 2 years? ( ) Yes ( ) No ( ) Do not know.

How long :.....

25. Do you use to wash hands before eating? ( ) Yes ( ) No

26. Do you use to wash hands after going to the bathroom? ( ) Yes ( ) No

27. Have you ever done a stool exam in the previous 2 years? ( ) Yes ( ) No

How long:.....

28. Do you have any symphoms?

|                      |                | Frequency? |
|----------------------|----------------|------------|
| Diarrhea             | ( ) Yes ( ) No |            |
| Constipation         | ( ) Yes ( ) No |            |
| Anal itching         | ( ) Yes ( ) No |            |
| Abdominal pain       | ( ) Yes ( ) No |            |
| Lack of appetite     | ( ) Yes ( ) No |            |
| Weight loss          | ( ) Yes ( ) No |            |
| Sickness and Nausea  | ( ) Yes ( ) No |            |
| Elimination of worms | ( ) Yes ( ) No |            |
